# Supplementary material
Source: Springer Nature journal article supplement (https://www.springermedizin.de/resource/supplementary/12885_2009_1622_MOESM2_ESM.pdf/9472486)

Cancer-specific survival rate

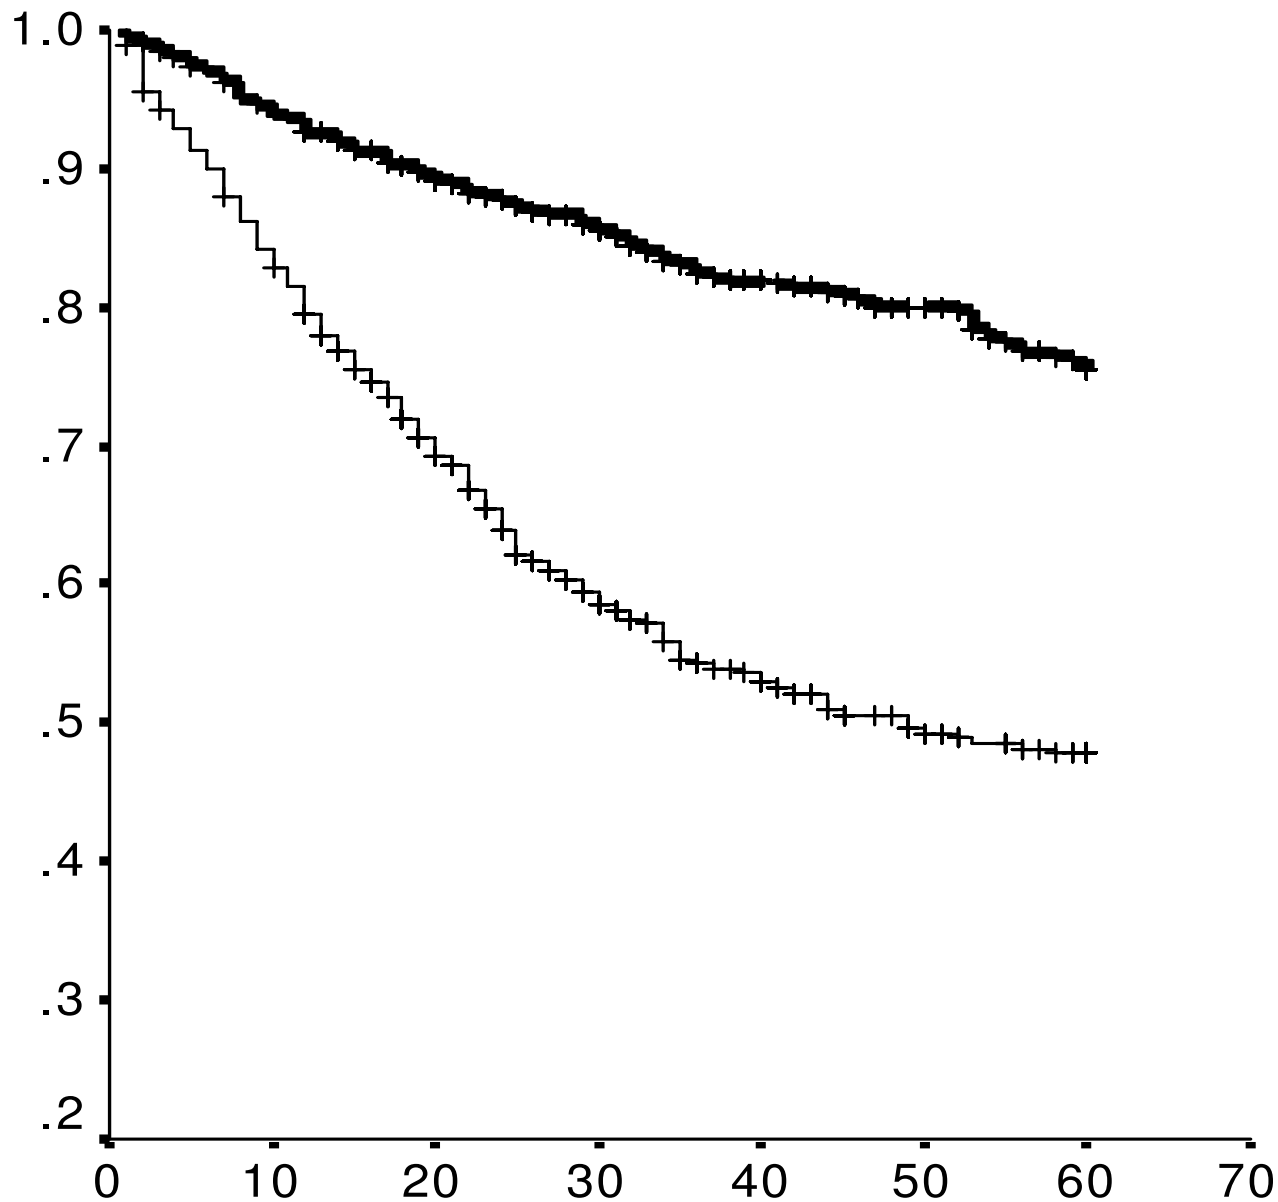

□ CEA  $\geq 5$  ng/ml

+

□ CEA  $< 5$  ng/ml

+

Months after operation

Supplement: MOESM2 [file 9472486]
